# Supplementary material for: Accelerating High b-Value Diffusion-Weighted MRI Using a Convolutional Recurrent Neural Network (CRNN-DWI)
Source: MDPI journal article supplement (doi:10.3390/bioengineering10070864), 2023-07-21
Supplement: s1 [file s1]

## Supplementary Materials

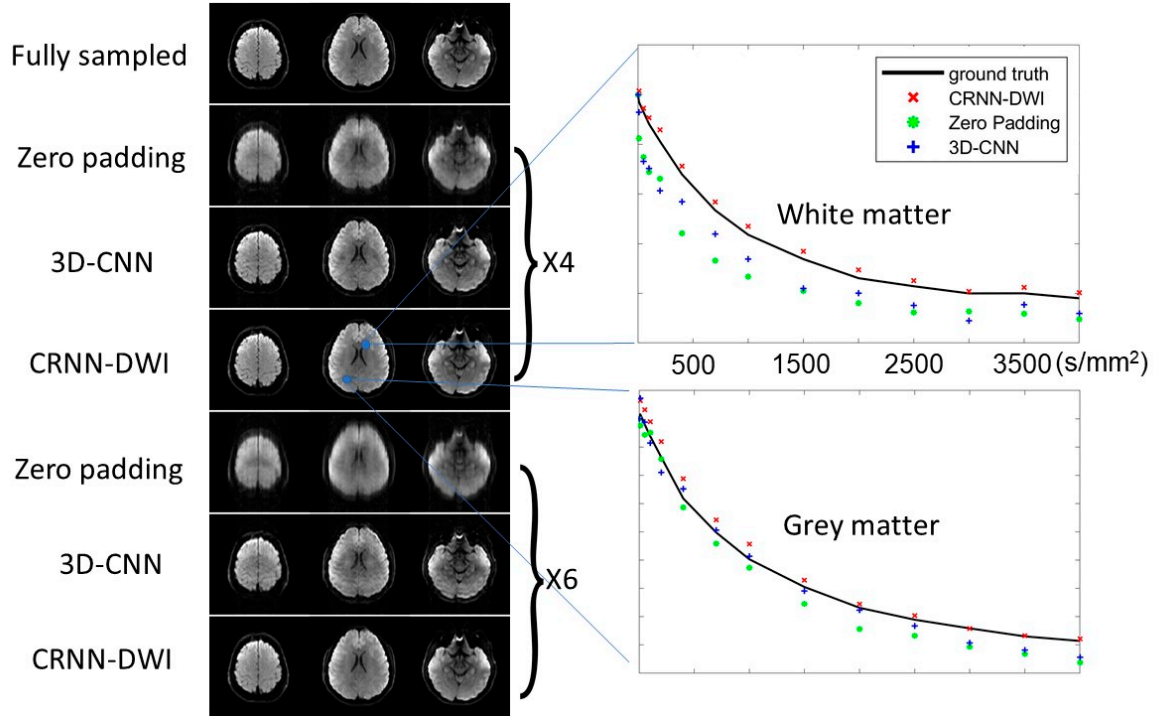

**Figure S1.** Representative trace-weighted images at  $b = 1000 \text{ s/mm}^2$  (left) using different reconstruction methods and the corresponding signal decay curves (right) from two randomly selected ROIs (white matter and gray matter as indicated by the blue areas). The trace-weighted images reconstructed using CRNN-DWI showed excellent image quality even with a six-fold undersampling. The signal decay curves from CRNN-DWI agreed well with the curves from the fully sampling images, whereas the curve from zero-padding and 3D-CNN exhibited substantial deviations.
